# Supplementary material for: Evaluating knowledge-based security questions for fallback authentication
Source: PeerJ Comput Sci. 2022 Mar 11;8:e903. doi: 10.7717/peerj-cs.903 (PMC9044221; doi:10.7717/peerj-cs.903)
Supplement: Supplemental Information 1 [file peerj-cs-08-903-s001.xlsx]

## Sheet: Demographic details
		Demographic details
User_ID	Age	Gender	Education	Technical background	Method of creating knowledge based authentication data	Method of saving knowledge based authentication data
1	24-34	Female	MS	Medium Background	Includes specific names	By written down
2	24-34	Female	B.C	Medium Background	Includes specific names	By written down
3	24-34	Female	MS	High Background or specialist	Includes specific names	By Automatic login
4	24-34	Female	B.C	Medium Background	Includes specific names	By memorize only
5	24-34	Female	B.C	Medium Background	Includes specific names	By Automatic login
6	24-34	Female	B.C	High Background or specialist	Includes specific names	By memorize only
7	24-34	Female	High School	Medium Background	Includes specific dates e.g. birthdate	By memorize only
8	24-34	Female	MS	High Background or specialist	Includes specific dates e.g. birthdate	By memorize only
9	24-34	Male	B.C	High Background or specialist	Includes complex words	By written down
10	24-34	Male	B.C	High Background or specialist	Includes complex words	By memorize and use helping methods
11	24-34	Male	B.C	Medium Background	In Randomly way	By memorize only
12	24-34	Male	MS	Medium Background	In Randomly way	By memorize only
13	24-34	Male	diploma	Medium Background	Includes specific names	By memorize only
14	24-34	Male	B.C	Medium Background	Includes specific names	By Automatic login
15	24-34	Female	B.C	High Background or specialist	Includes specific names	By written down
16	24-34	Female	B.C	Medium Background	Includes specific dates e.g. birthdate	By memorize only
17	24-34	Female	B.C	Medium Background	Includes specific names	By written down
18	24-34	Male	B.C	Medium Background	Includes specific names	By written down
19	24-34	Female	B.C	High Background or specialist	Includes specific names	By written down
20	24-34	Male	B.C	High Background or specialist	Includes specific names	By written down
21	24-34	Female	High School	No background	Includes specific dates e.g. birthdate	By written down
22	24-34	Female	B.C	Medium Background	In Randomly way	By memorize only
23	18-23	Male	B.C	Medium Background	Includes specific names	By memorize and use helping methods

## Sheet: Experiment data
	Q1.1	Q1.2	Q2	Q3	Q4	Q5	Q6	Q7	Q8	Q9	Q10
Experiment one	Chemistry		Starting a new company	AItalya	Amake something from nothinga	Atwitter-990a	Aderivative-990a	Image 5	Before 3 months	#ff0000	Think about the time you will spend
Experiment two	Chemistry		Starting a new company	AItaly.990A	AMoney is not everything.990a	Atwitter.990a	Adiffrentiation.990a	Image 5	Before 1 month	#ff0000	Think about the time you will spend
Levenshtein editing distance result on	0	2	0	5	23	1	10	0	2	0	0
EXACT function result	TRUE	FALSE	TRUE	FALSE	FALSE	FALSE	FALSE	TRUE	FALSE	TRUE	TRUE
	English		Videography	Riyadh123$	Scared123$	Tiktok123$	Definitely123$	Image 10	Before 1 month	#000000	Thinking about your wearing style and selection
	English		videographer	Riyadh	scared	tiktok	definitely	Image 10	Before 1 month	#000000	Thinking about your wearing style and selection
	0	0	4	4	5	5	5	0	0	0	0
	TRUE	TRUE	FALSE	FALSE	FALSE	FALSE	FALSE	TRUE	TRUE	TRUE	TRUE
	Psychology and Sociology		انشاء معرض للفنون	البحر	طفلين على دراجة	تويتر و تلقرام	Rain and snow	Image 10	Before 1 month	#ffffff	Exited to meet people and conversation
	Psychology and Sociology		معرض فنون	البحر	طفلين على دراجة	تويتر ، تلقرام	Rain , Water ، Out	Image 10	Before 1 month	#ffffff	Exited to meet people and conversation
	0	0	8	0	1	1	11	0	0	0	0
	TRUE	TRUE	FALSE	TRUE	FALSE	FALSE	FALSE	TRUE	TRUE	TRUE	TRUE
	Math		cyber security compliance senior officer	I lora Will Go To South Africa	Two lora Children Play A Bike	I lora Like Twitter 2021@	University lora Cyber Policy Employee	Image 12	Before 1 month	#000000	Exited to meet people and conversation
	Math		policy compliance specialist	south africa	Two children on a bicycle	twitter	policy university employee	Image 1	Before 2 weeks	#000000	Exited to meet people and conversation
	0	5	24	20	17	19	23	1	6	0	0
	TRUE	FALSE	FALSE	FALSE	FALSE	FALSE	FALSE	FALSE	FALSE	TRUE	TRUE
	Math		الاحلام لا تتحقق	البر	الطفل خائف من السقوط	1-Twitter	2-Education	Image 5	Before 3 months	#012f7b	Thinking about your wearing style and selection
	Math		الاحلام لا تتحقق	البر	طفل خائف من السقوط	1-Facebook	2-Education	Image 5	Before 3 months	#74a7ff	Thinking about your wearing style and selection
	0	0	1	0	3	9	0	0	0	6	0
	TRUE	TRUE	FALSE	TRUE	FALSE	FALSE	TRUE	TRUE	TRUE	FALSE	TRUE
	English		مبرمج حاسب آلـي	MH	B&SBPB	991	Water,prepare...ETC	Image 3	Before 3 months	#fcfcfc	Thinking about your wearing style and selection
	English		مبرمج حاسب آلي	لا أستطيع تذكر الاجابة السابقه لكن اعتقد أنه المنزل	بالسعي والصبر تحقق ماتريد .	واتس اب , انستقرام	Prepare , Leave it , ETC	Image 3	Before 1 month	#f7f2f2	Thinking about your wearing style and selection
	0	0	1	52	26	17	16	0	2	3	0
	TRUE	TRUE	FALSE	FALSE	FALSE	FALSE	FALSE	TRUE	FALSE	FALSE	TRUE
	Computer Science		data analyst	My favorite vacation place is Abha City at summer	A Child Rides A Bike With Her Brother	Tele@Snap@Ins10	0938Quality-Asia#	Image 10	Before 1 month	#e8e8e8	Think about the time you will spend
	Computer Science		Data analyst	My favorite vacation place is Abha at summer	A Child rides a bike with her brother	Tele-Snap-Insta	quality- Asia	Image 10	Before 1 month	#dedede	Think about the time you will spend
	0	0	1	5	6	4	7	0	0	4	0
	TRUE	TRUE	FALSE	FALSE	FALSE	FALSE	FALSE	TRUE	TRUE	FALSE	TRUE
	Math		الأحوال اامدنية	Al-Qassim05013074	Kids-Playing	SnapChat	Be-quite	Image 1	Before 1 weeks	#000000	Thinking about your wearing style and selection
	Math		الاحوال المدنيه	Qassim	Kids-Playing	SnapChat	Be-quite	Image 1	Before 1 weeks	#000000	Thinking about your wearing style and selection
	0	0	3	11	0	0	0	0	0	0	0
	TRUE	TRUE	FALSE	FALSE	TRUE	TRUE	TRUE	TRUE	TRUE	TRUE	TRUE
	Physics		استاذ جامعي	مكه	فرحة طفل	Snapchat	School - Pen - Bag - Chair	Image 7	Before 1 weeks	#f9d3e0	Thinking about your wearing style and selection
	Physics		استاذ جامعي	اسبانيا	Kida	Twitter- snapchat	School- work - pen - pencil	Image 7	Before 1 weeks	#ee719e	Thinking about your wearing style and selection
	0	0	0	7	9	10	14	0	0	6	0
	TRUE	TRUE	TRUE	FALSE	FALSE	FALSE	FALSE	TRUE	TRUE	FALSE	TRUE
	Math		الأحوال اامدنية	Al-Qassim05013074	Kids-Playing	Be-quite	Image 1	Before 1 weeks	#000000	Thinking about your wearing style and selection
	Math		الاحوال المدنيه	Qassim	Kids-Playing	Be-quite	Image 1	Before 1 weeks	#000000	Thinking about your wearing style and selection
	0	0	3	11	0	0	0	0	0	0	0
	TRUE	TRUE	FALSE	FALSE	TRUE	TRUE	TRUE	TRUE	TRUE	TRUE	TRUE
	Math		Application Developer	Discover New Places (coffee, restaurants, mall)	22 two kids play bicycle @	1@Snapchat, 2@Instegram , 3@Twitter	123, Hello, Good Luck, @	Image 11	Before 2 weeks	#383333	Thinking about your wearing style and selection
	Math		application development	discover new places	2 kids play bicycle	snapchatt, instagram, twitter	good luck, play, business	Image 11	Before 2 weeks	#222020	Thinking about your wearing style and selection
	0	11	5	32	7	12	22	0	0	6	0
	TRUE	FALSE	FALSE	FALSE	FALSE	FALSE	FALSE	TRUE	TRUE	FALSE	TRUE
	Arabic		تغليف هدايا	بالي	نجمه طفل اكبر عمره ١٤ فوق عجلتين	Nuts88	Love Going doing Book	Image 3	Before 3 months	#e66465	Thinking about your wearing style and selection
	Chemistry		تغليف هدايا	دبي	دراجه و اطفال	تيك توك	Good book	Image 12	Before 1 month	#f9d3e0	Thinking about your wearing style and selection
	8	4	1	4	28	7	15	2	2	6	0
	FALSE	FALSE	FALSE	FALSE	FALSE	FALSE	FALSE	FALSE	FALSE	FALSE	TRUE
	English		سيدة أعمال	QP	A&H	WST	MOAll	Image 3	Before 2 months	#808080	Preparation to arrive at the exact time.
	English		سيدة أعمال	QP	A&H	AllSM	:(	Image 3	Before 2 months	#808080	Preparation to arrive at the exact time.
	0	0	0	0	0	4	5	0	0	0	0
	TRUE	TRUE	TRUE	TRUE	TRUE	FALSE	FALSE	TRUE	TRUE	TRUE	TRUE
	Physics		متقنه اهم لغات العالم بما فيها لغه الصم و البكم	New York City	Children Riding Bicycle	-Podcasts-iBooks2021	2021LoveYou-Ok-	Image 1	Before 3 months	#000000	Thinking about your wearing style and selection
	Physics		إتقان لغات العالم الرئيسية	New York City	Children riding bicycle	-iBooks-podcast2021	-Iloveyou-ok2021	Image 1	Before 3 months	#000000	Thinking about your wearing style and selection
	0	0	30	0	2	13	11	0	0	0	0
	TRUE	TRUE	FALSE	TRUE	FALSE	FALSE	FALSE	TRUE	TRUE	TRUE	TRUE
	Arabic		كاتبة	uqsa	الأخت الكبرى أم	Snap instagram youtube 20_21	Yes no good morning good evining 20_21	Image 5	Before 1 month	#ffffff	Preparation to arrive at the exact time.
	Arabic		كاتبة	المدينة المنورة	الأخت أمان	snap instagram youtube	good morning good evining	Image 5	Before 1 month	#ffffff	Preparation to arrive at the exact time.
	0	0	0	16	9	7	13	0	0	0	0
	TRUE	TRUE	TRUE	FALSE	FALSE	FALSE	FALSE	TRUE	TRUE	TRUE	TRUE
	Math		Have my own business	Maldif255$	2boys255$	Insta255$	English255$	Image 1	Before 1 month	#ffffff	Thinking about your wearing style and selection
	Math		Havemyownbusiness	Maldif255$	Twoboys255$	Insta255$	English255$	Image 12	Before 1 month	#ffffff	Thinking about your wearing style and selection
	0	1	3	0	3	0	0	1	0	0	0
	TRUE	FALSE	FALSE	TRUE	FALSE	TRUE	TRUE	FALSE	TRUE	TRUE	TRUE
	Math		تطبيق خاص بمجال تخصصي	I Prefer 2 B With My Self	Innocence	J2Tr&Im.	ICn,Lt1OA.	Image 1	Before 1 month	#ffffff	Exited to meet people and conversation
	Math		تطبيق في مجال تخصصي	أفضل أن أكون مع نفسي	innocence	Insta&Twitter	IctlI1A.	Image 1	Before 1 month	#ffffff	Exited to meet people and conversation
	0	7	4	21	1	12	6	0	0	0	0
	TRUE	FALSE	FALSE	FALSE	FALSE	FALSE	FALSE	TRUE	TRUE	TRUE	TRUE
	Biology		CEO of an AI company	&M@ld!eve1544	2KidSon@B!cyCle	Sn@pChat&Y0utuBe	C0nGratul@$ion&	Image 2	Before 6 months	#808080	Preparation to arrive at the exact time.
	Biology		Owner of an electronic company	Malaysia	Brotherhood	Snapchat, Instagram	Congratulations	Image 2	Before 6 months	#808080	Preparation to arrive at the exact time.
	0	2	15	11	14	13	6	0	0	0	0
	TRUE	FALSE	FALSE	FALSE	FALSE	FALSE	FALSE	TRUE	TRUE	TRUE	TRUE
	English		افتتاح مشروع يحتوي على ادوات و خامات الكترونية	Yanbu	تخوف الطفل من السقوط مع استمرارية قيادة اخت الطفل في قيادة الدراجة	Yahoo1986Aht	Book	Image 8	Before 6 months	#e66465	Preparation to arrive at the exact time.
	Arabic		I can’t remember	Yanbu	الاعتماد على الاخ و شدة التعلق به في امور الحياة	WhatsApp	Unfortunately. Excellent.	Image 8	Before 1 month	#0000ff	Preparation to arrive at the exact time.
	7	7	43	1	45	11	24	0	2	6	0
	FALSE	FALSE	FALSE	FALSE	FALSE	FALSE	FALSE	TRUE	FALSE	FALSE	TRUE
	Psychology and Sociology		مخرج	دبي	طفلان يركبان دراجة هوائية	Snapchat , Twitter, instagram	Fun,sure,fine,cute	Image 1	Before 1 weeks	#000000	Thinking about your wearing style and selection
	Arabic		مخرج	مالديف	طفلان يركبان دراجة	يوتيوب، تويتر، واتس اب	Nice , cool , congrats	Image 1	Before 1 weeks	#000000	Think about the time you will spend
	22	5	0	5	7	27	19	0	0	0	28
	FALSE	FALSE	TRUE	FALSE	FALSE	FALSE	FALSE	TRUE	TRUE	TRUE	FALSE
	Math		متجر إلكتروني متكامل	Bali	عش الحياة بمراحلها العمرية	Snap chat , telegram	As you know, pronunciation,	Image 5	Before 2 weeks	#000000	Think about the time you will spend
	Arabic		متجر إلكتروني	بالي	التنوع بالأفكار يوصل للنجاح	سناب تويتر	Also, pronunciation	Image 5	Before 2 weeks	#000000	Think about the time you will spend
	5	7	7	5	24	20	10	0	0	0	0
	FALSE	FALSE	FALSE	FALSE	FALSE	FALSE	FALSE	TRUE	TRUE	TRUE	TRUE
	Physics		Owner for a business company	Maddenah Almonawarh	براءة الطفولة	YouTube88-	Hi baby18+	Image 1	Before 6 months	#7f7f7f	Thinking about your wearing style and selection
	Chemistry		Business man	Dubia	Innocence children	Youtube	Exactly	Image 5	Before 1 weeks	#adadad	Thinking about your wearing style and selection
	7	10	18	18	17	4	9	1	6	6	0
	FALSE	FALSE	FALSE	FALSE	FALSE	FALSE	FALSE	FALSE	FALSE	FALSE	TRUE
	Chemistry		طيار	Visit the Eastern Europe	2 handsomE kidS riding an old bike	WhatsApp?12	BuildinG?12	Image 12	Before 1 weeks	#0000ff	Think about the time you will spend
	Chemistry		طيار	Europe	They're going to play	WhatsApp	Book home	Image 12	Before 1 weeks	#e66465	Thinking about your wearing style and selection
	0	18	0	18	27	3	10	0	0	6	28
	TRUE	FALSE	TRUE	FALSE	FALSE	FALSE	FALSE	TRUE	TRUE	FALSE	FALSE
	18	11	6	5	3	3	4	19	17	14	21

## Sheet: Analysis
		female
		Male
						EXACT FUNCTION RESULT																									Female
		Question	Q1	Q1.2	Q2	Q3	Q4	Q5	Q6	Q7	Q8	Q9	Q10				Q1 time	Q2 time	Q3 time	Q4 time	Q5 time	Q6 time	Q7 time	Q8 time	Q9 time	Q10 time				#	Q1	Q1.2	Q2	Q3	Q4	Q5	Q6	Q7	Q8	Q9	Q10
		1	TRUE	FALSE	TRUE	FALSE	FALSE	FALSE	FALSE	TRUE	FALSE	TRUE	TRUE				25.66	18.623	95.735	57.271	36.895	66.293	32.627	18.779	11.244	290.73				1	0	2	0	5	23	1	10	0	2	0	0
		2	TRUE	TRUE	FALSE	FALSE	FALSE	FALSE	FALSE	TRUE	TRUE	TRUE	TRUE				10.156	26.635	7.667	24.673	21.784	10.496	11.074	6.704	6.068	86.245				3	0	0	8	0	1	1	11	0	0	0	0
		3	TRUE	TRUE	FALSE	TRUE	FALSE	FALSE	FALSE	TRUE	TRUE	TRUE	TRUE				17.609	12.352	35.369	51.986	22.109	41.363	45.409	34.622	6.326	85.021				4	0	5	24	20	17	19	23	1	6	0	0
		4	TRUE	FALSE	FALSE	FALSE	FALSE	FALSE	FALSE	FALSE	FALSE	TRUE	TRUE				31.386	12.683	40.728	59.028	21.604	45.539	62.505	17.892	24.685	117.255				6	0	0	1	52	26	17	16	0	2	3	0
		5	TRUE	TRUE	FALSE	TRUE	FALSE	FALSE	TRUE	TRUE	TRUE	FALSE	TRUE				13.671	14.672	9.398	10.285	7.1	91.511	35.457	9.912	8.664	93.845				7	0	0	1	5	6	4	7	0	0	4	0
		6	TRUE	TRUE	FALSE	FALSE	FALSE	FALSE	FALSE	TRUE	FALSE	FALSE	TRUE				37.522	11.549	75.752	17.155	14.54	404.87	37.155	13.21	8.288	99.75				8	0	0	3	11	0	0	0	0	0	0	0
		7	TRUE	TRUE	FALSE	FALSE	FALSE	FALSE	FALSE	TRUE	TRUE	FALSE	TRUE				14.335	16.213	26.182	13.765	29.364	19.533	28.141	6.983	42.35	123.931				9	0	0	0	7	9	10	14	0	0	6	0
		8	TRUE	TRUE	FALSE	FALSE	TRUE	TRUE	TRUE	TRUE	TRUE	TRUE	TRUE				54.404	43.101	53.81	25	29.539	18.39	19.374	19.229	15.453	193.382				10	0	0	3	11	0	0	0	0	0	0	0
		9	TRUE	TRUE	TRUE	FALSE	FALSE	FALSE	FALSE	TRUE	TRUE	FALSE	TRUE				37.115	276.149	20.086	67.138	18.148	69.75	67.193	49.397	18.629	165.016				11	0	11	5	32	7	12	22	0	0	6	0
		10	TRUE	TRUE	FALSE	FALSE	TRUE	TRUE	TRUE	TRUE	TRUE	TRUE	TRUE				14.059	14.242	11.509	6.958	29.146	119.53	28.553	10.178	4.956	137.912				12	8	4	1	4	28	7	15	2	2	6	0
		11	TRUE	FALSE	FALSE	FALSE	FALSE	FALSE	FALSE	TRUE	TRUE	FALSE	TRUE				20.543	11.036	9.263	16.91	15.703	24.218	30.507	13.276	11.326	99.874				13	0	0	0	0	0	4	5	0	0	0	0
		12	FALSE	FALSE	FALSE	FALSE	FALSE	FALSE	FALSE	FALSE	FALSE	FALSE	TRUE				40.714	21.362	54.349	41.334	10.565	35.824	27.171	22.797	13.639	74.683				14	0	0	30	0	2	13	11	0	0	0	0
		13	TRUE	TRUE	TRUE	TRUE	TRUE	FALSE	FALSE	TRUE	TRUE	TRUE	TRUE				9.955	23.452	10.512	51.646	9.976	37.092	13.043	11.921	11.02	40.606				15	0	0	0	16	9	7	13	0	0	0	0
		14	TRUE	TRUE	FALSE	TRUE	FALSE	FALSE	FALSE	TRUE	TRUE	TRUE	TRUE				204.98	11.504	22.9	80.615	431.719	26.629	21.539	23.343	4.29	20.847				16	0	1	3	0	3	0	0	1	0	0	0
		15	TRUE	TRUE	TRUE	FALSE	FALSE	FALSE	FALSE	TRUE	TRUE	TRUE	TRUE				25.843	27.216	36.372	26.856	65.421	64.043	15.123	10.708	9.193	96.824				17	0	7	4	21	1	12	6	0	0	0	0
		16	TRUE	FALSE	FALSE	TRUE	FALSE	TRUE	TRUE	FALSE	TRUE	TRUE	TRUE				20.678	84.824	39.18	53.561	10.113	20.617	21.013	8.999	9.341	152.646				AVR	0.533333	2	5.53333	12.2667	8.8	7.13333	10.2	0.266667	0.8	1.66667	0
		17	TRUE	FALSE	FALSE	FALSE	FALSE	FALSE	FALSE	TRUE	TRUE	TRUE	TRUE				16.735	7.157	19.718	11.938	14.832	25.38	27.427	13.27	12.644	78.526				STD	2.06559	3.33809	9.0701	14.4542	9.92256	6.41278	7.3212	0.593617	1.65616	2.55417	0
		18	TRUE	FALSE	FALSE	FALSE	FALSE	FALSE	FALSE	TRUE	TRUE	TRUE	TRUE				37.898	23.764	108.76	84.203	102.6	47.763	24.307	12.911	16.443	123.847				MAX	8	11	30	52	28	19	23	2	6	6	0
		19	FALSE	FALSE	FALSE	FALSE	FALSE	FALSE	FALSE	TRUE	FALSE	FALSE	TRUE				41.89	19.356	61.141	35.465	54.579	63.095	22.566	9.919	10.192	114.628
		20	FALSE	FALSE	TRUE	FALSE	FALSE	FALSE	FALSE	TRUE	TRUE	TRUE	FALSE				21.429	21.91	32.093	89.476	13.957	29.247	27.325	11.601	10.838	81.34					MALE
		21	FALSE	FALSE	FALSE	FALSE	FALSE	FALSE	FALSE	TRUE	TRUE	TRUE	TRUE				32.718	8.832	57.501	58.845	11.515	70.369	16.911	10.123	9.575	76.282				#	Q1	Q1.2	Q2	Q3	Q4	Q5	Q6	Q7	Q8	Q9	Q10
		22	FALSE	FALSE	FALSE	FALSE	FALSE	FALSE	FALSE	FALSE	FALSE	FALSE	TRUE				16.61	8.942	17.812	65.957	17.028	96.63	59.619	20.48	13.548	54.064				2	0	0	4	4	5	5	5	0	0	0	0
		23	TRUE	FALSE	TRUE	FALSE	FALSE	FALSE	FALSE	TRUE	TRUE	FALSE	FALSE				24.105	40.986	15.769	36.77	55.367	44.518	19.029	14.295	11.477	142.959	Max	Min		5	0	0	1	0	3	9	0	0	0	6	0
		TRUE ANSWER	18	11	6	5	3	3	4	19	17	14	21				33.4789	32.8939	37.4611	42.9059	45.3741	64.0304	30.1334	16.1108	12.6169	110.879	110.879	12.6169		18	0	2	15	11	14	13	6	0	0	0	0
			78.2609	47.8261	26.087	21.7391	13.0435	13.0435	17.3913	82.6087	73.913	60.8696	91.3043				39.1741	55.5626	27.9538	25.1514	87.1894	79.3933	15.3465	9.68149	7.92993	55.8765	87.1894	7.92993		19	7	7	43	1	45	11	24	0	2	6	0
	Specific names	14																												20	22	5	0	5	7	27	19	0	0	0	28
	Specific dates	4																												21	5	7	7	5	24	20	10	0	0	0	0
	Randomally	3																												22	7	10	18	18	17	4	9	1	6	6	0
	Complix words	2																												23	0	18	0	18	27	3	10	0	0	6	28
		1	TRUE	FALSE	TRUE	FALSE	FALSE	FALSE	FALSE	TRUE	FALSE	TRUE	TRUE		1	0	2	0	5	23	1	10	0	2	0	0				AVR	5.125	6.125	11	7.75	17.75	11.5	10.375	0.125	1	3	7
		3	TRUE	TRUE	FALSE	TRUE	FALSE	FALSE	FALSE	TRUE	TRUE	TRUE	TRUE		3	0	0	8	0	1	1	11	0	0	0	0				STD	7.5297	5.98659	14.619	7.12641	14.028	8.38366	7.72635	0.353553	2.13809	3.20713	12.9615
		4	TRUE	FALSE	FALSE	FALSE	FALSE	FALSE	FALSE	FALSE	FALSE	TRUE	TRUE		4	0	5	24	20	17	19	23	1	6	0	0				MAX	22	18	43	18	45	27	24	1	6	6	28
		5	TRUE	TRUE	FALSE	TRUE	FALSE	FALSE	TRUE	TRUE	TRUE	FALSE	TRUE		5	0	0	1	0	3	9	0	0	0	6	0
		6	TRUE	TRUE	FALSE	FALSE	FALSE	FALSE	FALSE	TRUE	FALSE	FALSE	TRUE		6	0	0	1	52	26	17	16	0	2	3	0
		7	TRUE	TRUE	FALSE	FALSE	FALSE	FALSE	FALSE	TRUE	TRUE	FALSE	TRUE		7	0	0	1	5	6	4	7	0	0	4	0
		8	TRUE	TRUE	FALSE	FALSE	TRUE	TRUE	TRUE	TRUE	TRUE	TRUE	TRUE		8	0	0	3	11	0	0	0	0	0	0	0
		9	TRUE	TRUE	TRUE	FALSE	FALSE	FALSE	FALSE	TRUE	TRUE	FALSE	TRUE		9	0	0	0	7	9	10	14	0	0	6	0
		10	TRUE	TRUE	FALSE	FALSE	TRUE	TRUE	TRUE	TRUE	TRUE	TRUE	TRUE		10	0	0	3	11	0	0	0	0	0	0	0
		12	FALSE	FALSE	FALSE	FALSE	FALSE	FALSE	FALSE	FALSE	FALSE	FALSE	TRUE		12	8	4	1	4	28	7	15	2	2	6	0
		13	TRUE	TRUE	TRUE	TRUE	TRUE	FALSE	FALSE	TRUE	TRUE	TRUE	TRUE		13	0	0	0	0	0	4	5	0	0	0	0
		16	TRUE	FALSE	FALSE	TRUE	FALSE	TRUE	TRUE	FALSE	TRUE	TRUE	TRUE		16	0	1	3	0	3	0	0	1	0	0	0
		20	FALSE	FALSE	TRUE	FALSE	FALSE	FALSE	FALSE	TRUE	TRUE	TRUE	FALSE		20	22	5	0	5	7	27	19	0	0	0	28
		21	FALSE	FALSE	FALSE	FALSE	FALSE	FALSE	FALSE	TRUE	TRUE	TRUE	TRUE		21	5	7	7	5	24	20	10	0	0	0	0
		TRUE VALUES	11	8	4	4	3	3	4	11	10	9	13		Max	22	7	24	52	28	27	23	2	6	6	28
			78.5714	57.1429	28.5714	28.5714	21.4286	21.4286	28.5714	78.5714	71.4286	64.2857	92.8571
		11	TRUE	FALSE	FALSE	FALSE	FALSE	FALSE	FALSE	TRUE	TRUE	FALSE	TRUE		11	0	11	5	32	7	12	22	0	0	6	0
		14	TRUE	TRUE	FALSE	TRUE	FALSE	FALSE	FALSE	TRUE	TRUE	TRUE	TRUE		14	0	0	30	0	2	13	11	0	0	0	0
		15	TRUE	TRUE	TRUE	FALSE	FALSE	FALSE	FALSE	TRUE	TRUE	TRUE	TRUE		15	0	0	0	16	9	7	13	0	0	0	0
		17	TRUE	FALSE	FALSE	FALSE	FALSE	FALSE	FALSE	TRUE	TRUE	TRUE	TRUE		17	0	7	4	21	1	12	6	0	0	0	0
			4	2	1	1	0	0	0	4	4	3	4		Max	0	11	30	32	9	13	22	0	0	6	0
			100	50	25	25	0	0	0	100	100	75	100
		2	TRUE	TRUE	FALSE	FALSE	FALSE	FALSE	FALSE	TRUE	TRUE	TRUE	TRUE		2	0	0	4	4	5	5	5	0	0	0	0
		22	FALSE	FALSE	FALSE	FALSE	FALSE	FALSE	FALSE	FALSE	FALSE	FALSE	TRUE		22	7	10	18	18	17	4	9	1	6	6	0
		23	TRUE	FALSE	TRUE	FALSE	FALSE	FALSE	FALSE	TRUE	TRUE	FALSE	FALSE		23	0	18	0	18	27	3	10	0	0	6	28
			2	1	1	0	0	0	0	2	2	1	2		Max	7	18	18	18	27	5	10	1	6	6	28
			66.6667	33.3333	33.3333	0	0	0	0	66.6667	66.6667	33.3333	66.6667
		18	TRUE	FALSE	FALSE	FALSE	FALSE	FALSE	FALSE	TRUE	TRUE	TRUE	TRUE		18	0	2	15	11	14	13	6	0	0	0	0
		19	FALSE	FALSE	FALSE	FALSE	FALSE	FALSE	FALSE	TRUE	FALSE	FALSE	TRUE		19	7	7	43	1	45	11	24	0	2	6	0
			1	0	0	0	0	0	0	2	1	1	2		Max	7	7	43	11	45	13	24	0	2	6	0
			50	0	0	0	0	0	0	100	50	50	100
		Q1	Q1.2	Q2	Q3	Q4	Q5	Q6	Q7	Q8	Q9	Q10
	1	TRUE	FALSE	TRUE	FALSE	FALSE	FALSE	FALSE	TRUE	FALSE	TRUE	TRUE
	2	TRUE	TRUE	FALSE	FALSE	FALSE	FALSE	FALSE	TRUE	TRUE	TRUE	TRUE
	3	TRUE	TRUE	FALSE	TRUE	FALSE	FALSE	FALSE	TRUE	TRUE	TRUE	TRUE
	4	TRUE	FALSE	FALSE	FALSE	FALSE	FALSE	FALSE	FALSE	FALSE	TRUE	TRUE
	5	TRUE	TRUE	FALSE	TRUE	FALSE	FALSE	TRUE	TRUE	TRUE	FALSE	TRUE
	6	TRUE	TRUE	FALSE	FALSE	FALSE	FALSE	FALSE	TRUE	FALSE	FALSE	TRUE
	7	TRUE	TRUE	FALSE	FALSE	FALSE	FALSE	FALSE	TRUE	TRUE	FALSE	TRUE
	8	TRUE	TRUE	FALSE	FALSE	TRUE	TRUE	TRUE	TRUE	TRUE	TRUE	TRUE
	9	TRUE	TRUE	TRUE	FALSE	FALSE	FALSE	FALSE	TRUE	TRUE	FALSE	TRUE
	10	TRUE	TRUE	FALSE	FALSE	TRUE	TRUE	TRUE	TRUE	TRUE	TRUE	TRUE
	11	TRUE	FALSE	FALSE	FALSE	FALSE	FALSE	FALSE	TRUE	TRUE	FALSE	TRUE
	12	FALSE	FALSE	FALSE	FALSE	FALSE	FALSE	FALSE	FALSE	FALSE	FALSE	TRUE
	13	TRUE	TRUE	TRUE	TRUE	TRUE	FALSE	FALSE	TRUE	TRUE	TRUE	TRUE
	14	TRUE	TRUE	FALSE	TRUE	FALSE	FALSE	FALSE	TRUE	TRUE	TRUE	TRUE
	15	TRUE	TRUE	TRUE	FALSE	FALSE	FALSE	FALSE	TRUE	TRUE	TRUE	TRUE
	16	TRUE	FALSE	FALSE	TRUE	FALSE	TRUE	TRUE	FALSE	TRUE	TRUE	TRUE
	17	TRUE	FALSE	FALSE	FALSE	FALSE	FALSE	FALSE	TRUE	TRUE	TRUE	TRUE
	18	TRUE	FALSE	FALSE	FALSE	FALSE	FALSE	FALSE	TRUE	TRUE	TRUE	TRUE
	19	FALSE	FALSE	FALSE	FALSE	FALSE	FALSE	FALSE	TRUE	FALSE	FALSE	TRUE
	20	FALSE	FALSE	TRUE	FALSE	FALSE	FALSE	FALSE	TRUE	TRUE	TRUE	FALSE
	21	FALSE	FALSE	FALSE	FALSE	FALSE	FALSE	FALSE	TRUE	TRUE	TRUE	TRUE
	22	FALSE	FALSE	FALSE	FALSE	FALSE	FALSE	FALSE	FALSE	FALSE	FALSE	TRUE
	23	TRUE	FALSE	TRUE	FALSE	FALSE	FALSE	FALSE	TRUE	TRUE	FALSE	FALSE
		Written down	9
		Memorize	9
		Automatic	3
		Memorize+Helpiing methods	2
		4	TRUE	FALSE	FALSE	FALSE	FALSE	FALSE	FALSE	FALSE	FALSE	TRUE	TRUE		4	0	5	24	20	17	19	23	1	6	0	0
		5	TRUE	TRUE	FALSE	TRUE	FALSE	FALSE	TRUE	TRUE	TRUE	FALSE	TRUE		5	0	0	1	0	3	9	0	0	0	6	0
		6	TRUE	TRUE	FALSE	FALSE	FALSE	FALSE	FALSE	TRUE	FALSE	FALSE	TRUE		6	0	0	1	52	26	17	16	0	2	3	0
		9	TRUE	TRUE	TRUE	FALSE	FALSE	FALSE	FALSE	TRUE	TRUE	FALSE	TRUE		9	0	0	0	7	9	10	14	0	0	6	0
		10	TRUE	TRUE	FALSE	FALSE	TRUE	TRUE	TRUE	TRUE	TRUE	TRUE	TRUE		10	0	0	3	11	0	0	0	0	0	0	0
		12	FALSE	FALSE	FALSE	FALSE	FALSE	FALSE	FALSE	FALSE	FALSE	FALSE	TRUE		12	8	4	1	4	28	7	15	2	2	6	0
		14	TRUE	TRUE	FALSE	TRUE	FALSE	FALSE	FALSE	TRUE	TRUE	TRUE	TRUE		14	0	0	30	0	2	13	11	0	0	0	0
		19	FALSE	FALSE	FALSE	FALSE	FALSE	FALSE	FALSE	TRUE	FALSE	FALSE	TRUE		19	7	7	43	1	45	11	24	0	2	6	0
		20	FALSE	FALSE	TRUE	FALSE	FALSE	FALSE	FALSE	TRUE	TRUE	TRUE	FALSE		20	22	5	0	5	7	27	19	0	0	0	28
			6	5	2	2	1	1	2	7	5	4	8		MAX	22	7	43	52	45	27	24	2	6	6	28
			66.6667	55.5556	22.2222	22.2222	11.1111	11.1111	22.2222	77.7778	55.5556	44.4444	88.8889
		2	TRUE	TRUE	FALSE	FALSE	FALSE	FALSE	FALSE	TRUE	TRUE	TRUE	TRUE		2	0	0	4	4	5	5	5	0	0	0	0
		7	TRUE	TRUE	FALSE	FALSE	FALSE	FALSE	FALSE	TRUE	TRUE	FALSE	TRUE		7	0	0	1	5	6	4	7	0	0	4	0
		8	TRUE	TRUE	FALSE	FALSE	TRUE	TRUE	TRUE	TRUE	TRUE	TRUE	TRUE		8	0	0	3	11	0	0	0	0	0	0	0
		11	TRUE	FALSE	FALSE	FALSE	FALSE	FALSE	FALSE	TRUE	TRUE	FALSE	TRUE		11	0	11	5	32	7	12	22	0	0	6	0
		15	TRUE	TRUE	TRUE	FALSE	FALSE	FALSE	FALSE	TRUE	TRUE	TRUE	TRUE		15	0	0	0	16	9	7	13	0	0	0	0
		17	TRUE	FALSE	FALSE	FALSE	FALSE	FALSE	FALSE	TRUE	TRUE	TRUE	TRUE		17	0	7	4	21	1	12	6	0	0	0	0
		21	FALSE	FALSE	FALSE	FALSE	FALSE	FALSE	FALSE	TRUE	TRUE	TRUE	TRUE		21	5	7	7	5	24	20	10	0	0	0	0
		22	FALSE	FALSE	FALSE	FALSE	FALSE	FALSE	FALSE	FALSE	FALSE	FALSE	TRUE		22	7	10	18	18	17	4	9	1	6	6	0
		23	TRUE	FALSE	TRUE	FALSE	FALSE	FALSE	FALSE	TRUE	TRUE	FALSE	FALSE		23	0	18	0	18	27	3	10	0	0	6	28
			7	4	2	0	1	1	1	8	8	5	8		MAX	7	18	18	32	27	20	22	1	6	6	28
			77.7778	44.4444	22.2222	0	11.1111	11.1111	11.1111	88.8889	88.8889	55.5556	88.8889
	The Best	3	TRUE	TRUE	FALSE	TRUE	FALSE	FALSE	FALSE	TRUE	TRUE	TRUE	TRUE		3	0	0	8	0	1	1	11	0	0	0	0
		13	TRUE	TRUE	TRUE	TRUE	TRUE	FALSE	FALSE	TRUE	TRUE	TRUE	TRUE		13	0	0	0	0	0	4	5	0	0	0	0
		16	TRUE	FALSE	FALSE	TRUE	FALSE	TRUE	TRUE	FALSE	TRUE	TRUE	TRUE		16	0	1	3	0	3	0	0	1	0	0	0
			3	2	1	3	1	1	1	2	3	3	3		MAX	0	1	8	0	3	4	11	1	0	0	0
			100	66.6667	33.3333	100	33.3333	33.3333	33.3333	66.6667	100	100	100
		1	TRUE	FALSE	TRUE	FALSE	FALSE	FALSE	FALSE	TRUE	FALSE	TRUE	TRUE		1	0	2	0	5	23	1	10	0	2	0	0
		18	TRUE	FALSE	FALSE	FALSE	FALSE	FALSE	FALSE	TRUE	TRUE	TRUE	TRUE		18	0	2	15	11	14	13	6	0	0	0	0
			2	0	1	0	0	0	0	2	1	2	2		MAX	0	2	15	11	23	13	10	0	2	0	0
			100	0	50	0	0	0	0	100	50	100	100
			Q1	Q1.2	Q2	Q3	Q4	Q5	Q6	Q7	Q8	Q9	Q10
		1	TRUE	FALSE	TRUE	FALSE	FALSE	FALSE	FALSE	TRUE	FALSE	TRUE	TRUE
		2	TRUE	TRUE	FALSE	FALSE	FALSE	FALSE	FALSE	TRUE	TRUE	TRUE	TRUE
		3	TRUE	TRUE	FALSE	TRUE	FALSE	FALSE	FALSE	TRUE	TRUE	TRUE	TRUE
		4	TRUE	FALSE	FALSE	FALSE	FALSE	FALSE	FALSE	FALSE	FALSE	TRUE	TRUE
		5	TRUE	TRUE	FALSE	TRUE	FALSE	FALSE	TRUE	TRUE	TRUE	FALSE	TRUE
		6	TRUE	TRUE	FALSE	FALSE	FALSE	FALSE	FALSE	TRUE	FALSE	FALSE	TRUE
		7	TRUE	TRUE	FALSE	FALSE	FALSE	FALSE	FALSE	TRUE	TRUE	FALSE	TRUE
		8	TRUE	TRUE	FALSE	FALSE	TRUE	TRUE	TRUE	TRUE	TRUE	TRUE	TRUE
		9	TRUE	TRUE	TRUE	FALSE	FALSE	FALSE	FALSE	TRUE	TRUE	FALSE	TRUE
		10	TRUE	TRUE	FALSE	FALSE	TRUE	TRUE	TRUE	TRUE	TRUE	TRUE	TRUE
		11	TRUE	FALSE	FALSE	FALSE	FALSE	FALSE	FALSE	TRUE	TRUE	FALSE	TRUE
		12	FALSE	FALSE	FALSE	FALSE	FALSE	FALSE	FALSE	FALSE	FALSE	FALSE	TRUE
		13	TRUE	TRUE	TRUE	TRUE	TRUE	FALSE	FALSE	TRUE	TRUE	TRUE	TRUE
		14	TRUE	TRUE	FALSE	TRUE	FALSE	FALSE	FALSE	TRUE	TRUE	TRUE	TRUE
		15	TRUE	TRUE	TRUE	FALSE	FALSE	FALSE	FALSE	TRUE	TRUE	TRUE	TRUE
		16	TRUE	FALSE	FALSE	TRUE	FALSE	TRUE	TRUE	FALSE	TRUE	TRUE	TRUE
		17	TRUE	FALSE	FALSE	FALSE	FALSE	FALSE	FALSE	TRUE	TRUE	TRUE	TRUE
		18	TRUE	FALSE	FALSE	FALSE	FALSE	FALSE	FALSE	TRUE	TRUE	TRUE	TRUE
		19	FALSE	FALSE	FALSE	FALSE	FALSE	FALSE	FALSE	TRUE	FALSE	FALSE	TRUE
		20	FALSE	FALSE	TRUE	FALSE	FALSE	FALSE	FALSE	TRUE	TRUE	TRUE	FALSE
		21	FALSE	FALSE	FALSE	FALSE	FALSE	FALSE	FALSE	TRUE	TRUE	TRUE	TRUE
		22	FALSE	FALSE	FALSE	FALSE	FALSE	FALSE	FALSE	FALSE	FALSE	FALSE	TRUE
		23	TRUE	FALSE	TRUE	FALSE	FALSE	FALSE	FALSE	TRUE	TRUE	FALSE	FALSE
			B.C	16
			M.S	4
			High SC	2
			Diploma	1
		M	1	TRUE	FALSE	TRUE	FALSE	FALSE	FALSE	FALSE	TRUE	FALSE	TRUE	TRUE		1	0	2	0	5	23	1	10	0	2	0	0
		M	2	TRUE	TRUE	FALSE	FALSE	FALSE	FALSE	FALSE	TRUE	TRUE	TRUE	TRUE		2	0	0	4	4	5	5	5	0	0	0	0
		M	3	TRUE	TRUE	FALSE	TRUE	FALSE	FALSE	FALSE	TRUE	TRUE	TRUE	TRUE		3	0	0	8	0	1	1	11	0	0	0	0
		M	5	TRUE	TRUE	FALSE	TRUE	FALSE	FALSE	TRUE	TRUE	TRUE	FALSE	TRUE		5	0	0	1	0	3	9	0	0	0	6	0
		H	6	TRUE	TRUE	FALSE	FALSE	FALSE	FALSE	FALSE	TRUE	FALSE	FALSE	TRUE		6	0	0	1	52	26	17	16	0	2	3	0
		H	7	TRUE	TRUE	FALSE	FALSE	FALSE	FALSE	FALSE	TRUE	TRUE	FALSE	TRUE		7	0	0	1	5	6	4	7	0	0	4	0
		M	8	TRUE	TRUE	FALSE	FALSE	TRUE	TRUE	TRUE	TRUE	TRUE	TRUE	TRUE		8	0	0	3	11	0	0	0	0	0	0	0
		H	9	TRUE	TRUE	TRUE	FALSE	FALSE	FALSE	FALSE	TRUE	TRUE	FALSE	TRUE		9	0	0	0	7	9	10	14	0	0	6	0
		M	10	TRUE	TRUE	FALSE	FALSE	TRUE	TRUE	TRUE	TRUE	TRUE	TRUE	TRUE		10	0	0	3	11	0	0	0	0	0	0	0
		M	12	FALSE	FALSE	FALSE	FALSE	FALSE	FALSE	FALSE	FALSE	FALSE	FALSE	TRUE		12	8	4	1	4	28	7	15	2	2	6	0
		M	13	TRUE	TRUE	TRUE	TRUE	TRUE	FALSE	FALSE	TRUE	TRUE	TRUE	TRUE		13	0	0	0	0	0	4	5	0	0	0	0
		M	17	TRUE	FALSE	FALSE	FALSE	FALSE	FALSE	FALSE	TRUE	TRUE	TRUE	TRUE		17	0	7	4	21	1	12	6	0	0	0	0
		H	18	TRUE	FALSE	FALSE	FALSE	FALSE	FALSE	FALSE	TRUE	TRUE	TRUE	TRUE		18	0	2	15	11	14	13	6	0	0	0	0
		H	19	FALSE	FALSE	FALSE	FALSE	FALSE	FALSE	FALSE	TRUE	FALSE	FALSE	TRUE		19	7	7	43	1	45	11	24	0	2	6	0
		H	20	FALSE	FALSE	TRUE	FALSE	FALSE	FALSE	FALSE	TRUE	TRUE	TRUE	FALSE		20	22	5	0	5	7	27	19	0	0	0	28
		M	22	FALSE	FALSE	FALSE	FALSE	FALSE	FALSE	FALSE	FALSE	FALSE	FALSE	TRUE		22	7	10	18	18	17	4	9	1	6	6	0
		True_Value #		12	9	4	3	3	2	3	14	11	9	15			22	10	43	52	45	27	24	2	6	6	28
		True %		75	56.25	25	18.75	18.75	12.5	18.75	87.5	68.75	56.25	93.75
		M	4	TRUE	FALSE	FALSE	FALSE	FALSE	FALSE	FALSE	FALSE	FALSE	TRUE	TRUE		4	0	5	24	20	17	19	23	1	6	0	0
		H	11	TRUE	FALSE	FALSE	FALSE	FALSE	FALSE	FALSE	TRUE	TRUE	FALSE	TRUE		11	0	11	5	32	7	12	22	0	0	6	0
		H	16	TRUE	FALSE	FALSE	TRUE	FALSE	TRUE	TRUE	FALSE	TRUE	TRUE	TRUE		16	0	1	3	0	3	0	0	1	0	0	0
		M	23	TRUE	FALSE	TRUE	FALSE	FALSE	FALSE	FALSE	TRUE	TRUE	FALSE	FALSE		23	0	18	0	18	27	3	10	0	0	6	28
				4	0	1	1	0	1	1	2	3	2	3			0	18	24	32	27	19	23	1	6	6	28
				100	0	25	25	0	25	25	50	75	50	75
		N	14	TRUE	TRUE	FALSE	TRUE	FALSE	FALSE	FALSE	TRUE	TRUE	TRUE	TRUE		14	0	0	30	0	2	13	11	0	0	0	0
		M	15	TRUE	TRUE	TRUE	FALSE	FALSE	FALSE	FALSE	TRUE	TRUE	TRUE	TRUE		15	0	0	0	16	9	7	13	0	0	0	0
				2	2	1	1	0	0	0	2	2	2	2			0	0	30	16	9	13	13	0	0	0	0
				100	100	50	50	0	0	0	100	100	100	100
		M	21	FALSE	FALSE	FALSE	FALSE	FALSE	FALSE	FALSE	TRUE	TRUE	TRUE	TRUE		21	5	7	7	5	24	20	10	0	0	0	0
				0	0	0	0	0	0	0	1	1	1	1			5	7	7	5	24	20	10	0	0	0	0
				0	0	0	0	0	0	0	100	100	100	100
